# Supplementary material
Source: PubMed Central journal article supplement (PMC7896354)
Supplement: NIHMS1662172-supplement-Supplemental_Digital_Content.pdf [file NIHMS1662172-supplement-Supplemental_Digital_Content.pdf]

**Supplementary Information**

**Short Term Exposure to Fine Particulate Matter and Cardiovascular Hospitalizations  
among Low Income and Disabled Americans**

Priyanka deSouza, Danielle Braun, Robbie Parks, Joel Schwartz, Francesca Dominici, Marianthi-Anna Kioumourtzoglou

**List of Tables**

eTable 1: Sensitivity Analyses ..... 2

**List of Figures**

eFigure 1: Daily averaged PM<sub>2.5</sub> for each state ..... 3

**eTable 1:** Sensitivity analyses of the % increase in CVD hospitalizations for every 10  $\mu\text{g}/\text{m}^3$  increase in  $\text{PM}_{2.5}$  when using different degrees of freedom (df) to account for air temperature and dew-point confounding, as well as by including estimates of  $\text{O}_3$ .

| df for confounding adjustment for temperature | %Change | 95% CI   |
|-----------------------------------------------|---------|----------|
| df = 3                                        | 0.9     | 0.6, 1.1 |
| df = 6                                        | 0.9     | 0.7, 1.1 |
| df = 9                                        | 0.9     | 0.7, 1.1 |
| <b>Including Ozone<sup>a,b</sup></b>          | 1.0     | 0.7, 1.2 |

<sup>a</sup> $N_{\text{cases}}=3,625,101$   
<sup>b</sup>Using a natural spline (3 df)

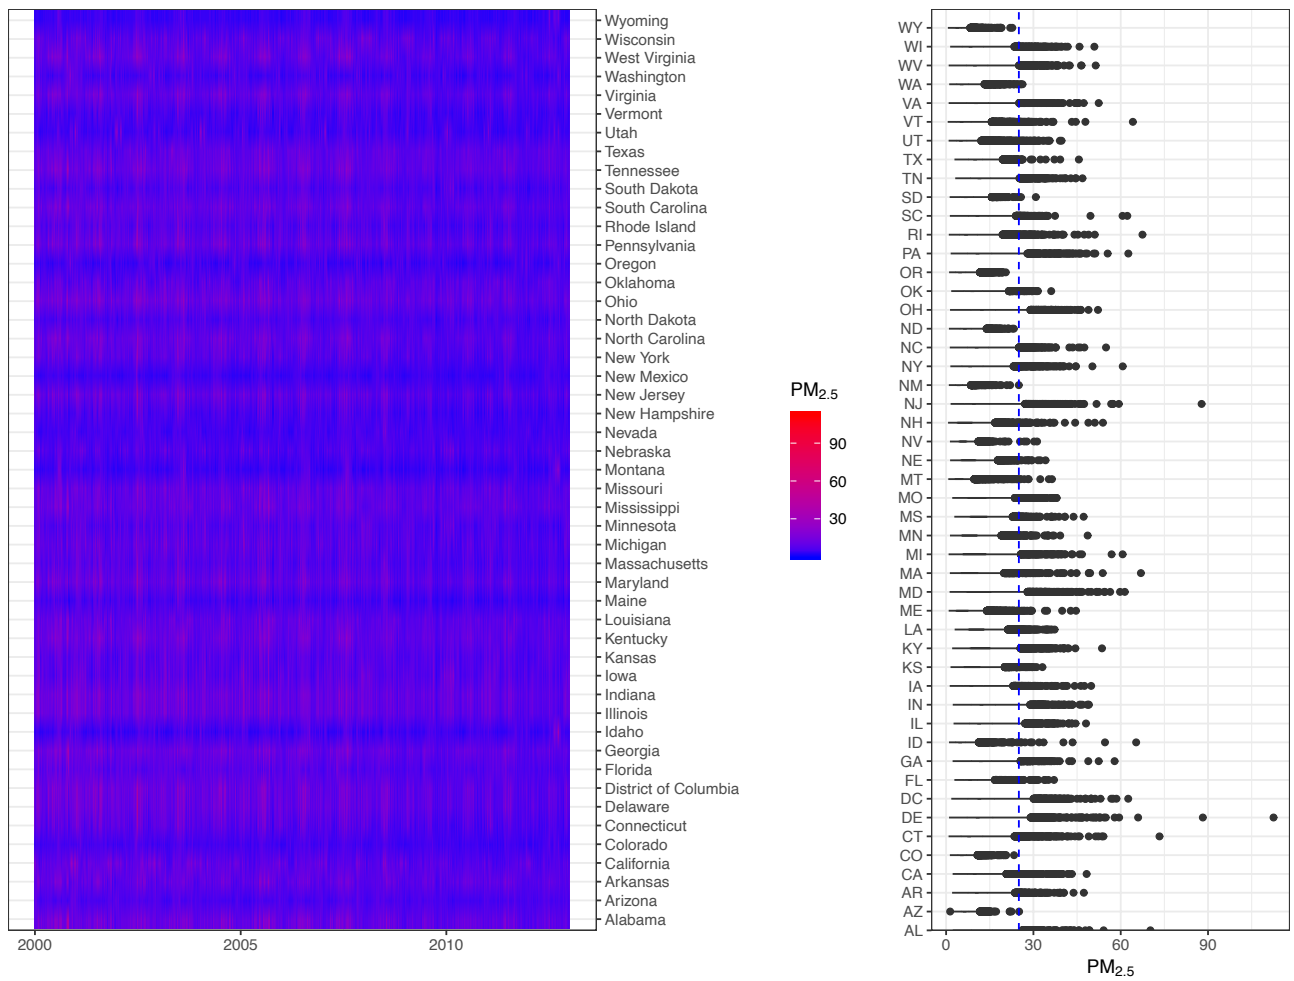

**eFigure 1:** Predicted daily PM<sub>2.5</sub> (μg/m<sup>3</sup>) for each state from Jan 1, 2000 to Dec 31, 2012.
